# Supplementary material for: Factors Associated With Declining Lung Cancer Screening After Discussion With a Physician in a Cohort of US Veterans
Source: PubMed Central journal article supplement (PMC9382440; doi:10.1001/jamanetworkopen.2022.27126), 2022-08-16
Supplement: jamanetwopen-e2227126-s001.pdf [file jamanetwopen-e2227126-s001.pdf]

## Supplementary Online Content

Núñez ER, Caverly TJ, Zhang S, et al. Factors associated with declining lung cancer screening after discussion with a physician in a cohort of US veterans. *JAMA Netw Open*. 2022;5(8):e2227126. doi:10.1001/jamanetworkopen.2022.27126

**eTable 1.** *International Classification of Diseases, Ninth Revision (ICD-9) and International Statistical Classification of Diseases and Related Health Problems, Tenth Revision (ICD-10) Current Procedural Terminology Codes for Comorbidities*

**eTable 2.** *Multivariable Analysis of Primary Model Compared With Models Used in Sensitivity Analyses, Including Veterans With Conflicting Eligibility Documentation*

This supplementary material has been provided by the authors to give readers additional information about their work.

**eTable 1. International Classification of Diseases, Ninth Revision (ICD-9) and International Statistical Classification of Diseases and Related Health Problems, Tenth Revision (ICD-10) Current Procedural Terminology Codes for Comorbidities**

| Comorbidity                                                                                                                                                                            | ICD-9-CM codes                                                                                                                                                                                                                  | ICD-10-CM codes                                                                                                                                                                                          | ICD-9 procedure codes           | ICD-10 procedure codes                                                  | CPT4/HCPCS procedure codes                                                                                |
|----------------------------------------------------------------------------------------------------------------------------------------------------------------------------------------|---------------------------------------------------------------------------------------------------------------------------------------------------------------------------------------------------------------------------------|----------------------------------------------------------------------------------------------------------------------------------------------------------------------------------------------------------|---------------------------------|-------------------------------------------------------------------------|-----------------------------------------------------------------------------------------------------------|
| Elixhauser Comorbidity Index                                                                                                                                                           | your code or: <a href="http://mchp-appserv.cpe.umanoitoba.ca/Upload/SAS/ICD10_EX.sas.txt">http://mchp-appserv.cpe.umanoitoba.ca/Upload/SAS/ICD10_EX.sas.txt</a>                                                                 |                                                                                                                                                                                                          |                                 |                                                                         |                                                                                                           |
| <b>Other morbidities</b>                                                                                                                                                               |                                                                                                                                                                                                                                 |                                                                                                                                                                                                          |                                 |                                                                         |                                                                                                           |
| <i>The next 2 variables are based on a single principal code from inpatient records (VA or Medicare) or primary code from Emergency room data anytime before or on the index date.</i> |                                                                                                                                                                                                                                 |                                                                                                                                                                                                          |                                 |                                                                         |                                                                                                           |
| MACE                                                                                                                                                                                   | 410, 410.xx, 411.0, 411.1, 411.81, 411.89, 412, 412.xx, 427.5                                                                                                                                                                   | I20.0, I21, I21.x, I21.xx, I22.x, I24.0, I24.1, I24.8, I24.9, I25.2, I46.9                                                                                                                               | 36.01-36.07, 36.09-36.16, 36.19 | 0210xxx, 02111xxx, 0212xxx, 0213xxx, 0270xxx, 0271xxx, 0272xxx, 0273xxx | 33510-33519, 33521-33523, 33533-33536, 33572, 92973-92975, 92977, 92980-92982, 92984, 92986, 92995, 92996 |
| Stroke, all                                                                                                                                                                            | 430-434, 436, 437.1, 438                                                                                                                                                                                                        | I60.9, I61.9, I62.1, I62.00, I62.9, I65.1, I63.22, I66x, I66.xx, I63.30, I64.40, I63.50, I67.8x, I69.9xx                                                                                                 |                                 |                                                                         |                                                                                                           |
| <i>All other morbidity variables are based on 2+ days with codes (IP or OP, VA or Medicare) in the 731 days (2 years) before and including the index date, except as noted.</i>        |                                                                                                                                                                                                                                 |                                                                                                                                                                                                          |                                 |                                                                         |                                                                                                           |
| COPD/ Emphysema                                                                                                                                                                        | 491.xx, 492.xx, 496.xx                                                                                                                                                                                                          | J40-J44.xx                                                                                                                                                                                               |                                 |                                                                         |                                                                                                           |
| Interstitial lung disease                                                                                                                                                              | 508.1, 515, 516.31, 516.32, 516.34, 518.89, 714.81, 770.7                                                                                                                                                                       | J70.1, J84.111, J84.112, J84.113, J84.115, J84.9, J98.4, M05.10, P27.0, P27.1, P27.8                                                                                                                     |                                 |                                                                         |                                                                                                           |
| Congestive heart failure                                                                                                                                                               | 428,428.xx,402.01,402.11,402.91,404.01,404.03, 404.11, 404.13, 404.91, 404.93                                                                                                                                                   | I50.x, I50.xx, I11.0, I13.0, I13.2                                                                                                                                                                       |                                 |                                                                         |                                                                                                           |
| HIV                                                                                                                                                                                    | 042- 044.xx                                                                                                                                                                                                                     | B20, B17.1x, B17.8, B17.9, B18.2, B18.8, B18.9                                                                                                                                                           |                                 |                                                                         |                                                                                                           |
| Dementia, including Alzheimers                                                                                                                                                         | 290, 290.xx, 331.0-331.82, 331.9, 331.9x, 797                                                                                                                                                                                   | F01.5, F01.5x, F02.8, F02.8x, F03.9, F03.9x, G30.x, G31.x, G31.xx, R41.81                                                                                                                                |                                 |                                                                         |                                                                                                           |
| Other neurodegenerative diseases                                                                                                                                                       | 340, 340.xx, 332, 332.00                                                                                                                                                                                                        | G20, G31.83, G35                                                                                                                                                                                         |                                 |                                                                         |                                                                                                           |
| Depression (MDPR+ODPR)                                                                                                                                                                 | 296.2-296.3x, 300.4, 300.4x, 300.9, 300.9x, 301.12, 309.0, 309.0x, 309.1, 309.1x, 309.28, 311, 311.x                                                                                                                            | F32.x, F32.xx, F33.x, F33.xx, F34.1, F43.21, F43.23, F48.9                                                                                                                                               |                                 |                                                                         |                                                                                                           |
| PTSD                                                                                                                                                                                   | 309.81                                                                                                                                                                                                                          | F43.10, F43.11, F43.12                                                                                                                                                                                   |                                 |                                                                         |                                                                                                           |
| Schizophrenia                                                                                                                                                                          | 295, 295.xx                                                                                                                                                                                                                     | F20.x, F20.xx                                                                                                                                                                                            |                                 |                                                                         |                                                                                                           |
| Other psychiatric conditions                                                                                                                                                           | 292.1, 292.1x, 292.81, 292.83, 292.84, 293.0, 293.0x, 293.1, 293.1x, 296-296.1x, 296.4-296.9x, 297-298.xx, 300.0-300.3x, 309.3-309.4x, 312.34                                                                                   | F05, F19.921, F19.94, F19.950, F19.951, F19.96, F22, F23, F28-F31.xx, F32.3, F33.3, F34.0, F34.81, F34.89, F39-F42.xx, F43.24, F43.25, F44.89, F63.81                                                    |                                 |                                                                         |                                                                                                           |
| Alcohol /Drug Abuse/Use (Substance Use Disorder)                                                                                                                                       | 291, 291.xx, 292.0, 292.0x, 292.89, 292.9, 292.9x, 303, 303.xx, 304, 304.xx, 305, 305.0, 305.0x, 305.2-305.9x, 357.5, 425.5, 535.3, 571.0-571.3x, 760.71, 790.3, 977.3, 980.0, 980.9, E860-E860.1, E860.9, E947.3, V11.3, V79.1 | F10-F16.xx, F18-F19.xx, F62.1, I42.6, K29.20, K29.21, K70.x, K70.xx, P04.3, Q86.0, R78.0, T50.991A, T51.0X1A, T51.0X2A, T51.0X3A, T51.0X4A, T51.91XA, T51.92XA, T51.93XA, T51.94XA, NOD.X, Z65.8, Z13.89 |                                 |                                                                         |                                                                                                           |

**eTable 2.** Multivariable Analysis of Primary Model Compared With Models Used in Sensitivity Analyses, Including Veterans With Conflicting Eligibility Documentation

|                                                                | Primary Model (N=43,450) |        |       | Sensitivity model including Veterans with conflicting eligibility (N=50,345) |        |       |
|----------------------------------------------------------------|--------------------------|--------|-------|------------------------------------------------------------------------------|--------|-------|
|                                                                | OR                       | 95% CI |       | OR                                                                           | 95% CI |       |
| <b>Age (65-69 as reference)</b>                                |                          |        |       |                                                                              |        |       |
| 55-59                                                          | <b>0.69</b>              | 0.64   | 0.74  | <b>0.69</b>                                                                  | 0.64   | 0.73  |
| 60-64                                                          | <b>0.80</b>              | 0.75   | 0.85  | <b>0.82</b>                                                                  | 0.77   | 0.87  |
| 70-74                                                          | <b>1.27</b>              | 1.19   | 1.37  | <b>1.24</b>                                                                  | 1.17   | 1.33  |
| 75-80                                                          | <b>1.93</b>              | 1.73   | 2.17  | <b>1.82</b>                                                                  | 1.64   | 2.02  |
| Female                                                         | 1.08                     | 0.95   | 1.24  | 1.08                                                                         | 0.95   | 1.22  |
| <b>Race (white as reference)</b>                               |                          |        |       |                                                                              |        |       |
| Black                                                          | <b>0.80</b>              | 0.73   | 0.87  | <b>0.80</b>                                                                  | 0.74   | 0.86  |
| Hispanic                                                       | <b>0.62</b>              | 0.49   | 0.78  | <b>0.61</b>                                                                  | 0.50   | 0.75  |
| Other                                                          | 0.98                     | 0.80   | 1.20  | 0.91                                                                         | 0.75   | 1.10  |
| Married                                                        | 1.05                     | 0.99   | 1.10  | 1.04                                                                         | 0.99   | 1.09  |
| Zip code-level income*                                         | 0.95                     | 0.87   | 1.03  | 0.96                                                                         | 0.89   | 1.03  |
| Live in rural zip code                                         | 1.01                     | 0.95   | 1.08  | 1.01                                                                         | 0.95   | 1.07  |
| Distance to VA Facility*                                       | 1.06                     | 1.03   | 1.08  | 1.06                                                                         | 1.03   | 1.08  |
| <b>VA Benefits (Limited with copayments as reference)</b>      |                          |        |       |                                                                              |        |       |
| Highly disabled                                                | 0.94                     | 0.87   | 1.02  | 0.94                                                                         | 0.87   | 1.01  |
| Low or moderately disabled                                     | <b>0.89</b>              | 0.82   | 0.96  | <b>0.89</b>                                                                  | 0.83   | 0.96  |
| Poverty with no copayments                                     | <b>0.92</b>              | 0.85   | 0.99  | <b>0.92</b>                                                                  | 0.86   | 0.99  |
| <b>Comorbid conditions</b>                                     |                          |        |       |                                                                              |        |       |
| Currently smoking                                              | <b>0.90</b>              | 0.85   | 0.96  | <b>0.90</b>                                                                  | 0.85   | 0.95  |
| History of major adverse cardiac event                         | 0.95                     | 0.88   | 1.04  | 0.98                                                                         | 0.90   | 1.05  |
| Congestive heart failure                                       | <b>1.25</b>              | 1.12   | 1.39  | <b>1.23</b>                                                                  | 1.11   | 1.36  |
| Stroke                                                         | <b>1.14</b>              | 1.01   | 1.28  | <b>1.13</b>                                                                  | 1.01   | 1.26  |
| Chronic obstructive pulmonary disease                          | 1.00                     | 0.94   | 1.06  | 0.99                                                                         | 0.94   | 1.05  |
| Interstitial lung disease                                      | 0.98                     | 1.44   | 1.21  | <b>1.02</b>                                                                  | 1.43   | 1.27  |
| Dementia                                                       | 1.03                     | 0.88   | 1.21  | 1.05                                                                         | 0.91   | 1.21  |
| Depression                                                     | <b>0.86</b>              | 0.80   | 0.92  | <b>0.86</b>                                                                  | 0.81   | 0.91  |
| Post-traumatic stress disorder                                 | 0.95                     | 0.88   | 1.03  | 0.93                                                                         | 0.87   | 1.01  |
| Substance use disorder                                         | 0.95                     | 0.89   | 1.02  | 0.95                                                                         | 0.89   | 1.01  |
| Schizophrenia                                                  | <b>1.87</b>              | 1.60   | 2.19  | <b>1.82</b>                                                                  | 1.58   | 2.09  |
| Elixhauser Comorbidity Index score                             | <b>1.04</b>              | 1.03   | 1.05  | <b>1.04</b>                                                                  | 1.03   | 1.05  |
| Human Immunodeficiency Virus                                   | 0.93                     | 0.80   | 1.08  | 0.93                                                                         | 0.81   | 1.07  |
| <b>Healthcare Utilization in the year before index date*</b>   |                          |        |       |                                                                              |        |       |
| Outpatient visits                                              | <b>0.70</b>              | 0.67   | 0.72  | <b>0.70</b>                                                                  | 0.68   | 0.73  |
| Emergency department visits                                    | <b>0.86</b>              | 0.80   | 0.92  | <b>0.87</b>                                                                  | 0.82   | 0.92  |
| Inpatient days                                                 | 1.04                     | 0.99   | 1.10  | 1.03                                                                         | 0.99   | 1.08  |
| Long-term care facility days                                   | <b>1.07</b>              | 1.19   | 1.13  | <b>1.08</b>                                                                  | 1.19   | 1.16  |
| <b>Facility-level characteristics</b>                          |                          |        |       |                                                                              |        |       |
| <b>US Census region (Northeast as reference)</b>               |                          |        |       |                                                                              |        |       |
| Midwest                                                        | 1.56                     | 0.26   | 9.60  | 1.38                                                                         | 0.25   | 7.56  |
| South                                                          | 1.17                     | 0.24   | 5.66  | 1.06                                                                         | 0.24   | 4.59  |
| West                                                           | 0.93                     | 0.18   | 4.88  | 0.79                                                                         | 0.17   | 3.73  |
| <b>Lung cancer screening volume (high volume as reference)</b> |                          |        |       |                                                                              |        |       |
| Low                                                            | 3.74                     | 0.72   | 19.41 | 3.06                                                                         | 0.65   | 14.36 |
| Medium                                                         | 2.00                     | 0.42   | 9.64  | 1.92                                                                         | 0.44   | 8.35  |

\* **Bolded Odds ratio (OR)** are statistically significant at alpha = 0.05
